# Supplementary material for: Assembly of a large cerium(iii)-containing tungstotellurites(iv) nanocluster: [Ce10Te8W88O298(OH)12(H2O)40]18−
Source: Royal Society of Chemistry journal article supplement (doi:10.1039/c5dt01711d), 2015-01-01
Supplement: c5dt01711d1.pdf [file c5dt01711d1.pdf]

# Assembly of Large Cerium(III)-Containing Tungstotellurites(IV)

## Nanocluster: $[\text{Ce}_{10}\text{Te}_8\text{W}_{88}\text{O}_{298}(\text{OH})_{12}(\text{H}_2\text{O})_{40}]^{18-}$

*Wei-Chao Chen, Chao Qin, Xin-Long Wang,\* Yang-Guang Li, Hong-Ying Zang, Kui-Zhan Shao, Zhong-Min Su\* and En-Bo Wang<sup>a</sup>*

*<sup>a</sup>Institute of Functional Material Chemistry, Key Lab of Polyoxometalate Science of Ministry of Education, Faculty of Chemistry, Northeast Normal University, Changchun, 130024 Jilin, People's Republic of China.*

## CONTENTS

### Section 1 A detailed survey tellurite as heteroanions in POTs chemistry

### Section 2 Synthesis, Crystal Data, and Structures of 1

#### 2.1 Synthesis Discussion

#### 2.2 Crystal Data

#### 2.3 Structures of 1

#### 2.4 The BVS Calculation Result of the Oxygen Atoms

### Section 3 Experimental Section

#### 3.1 Materials and Physical Measurements

### Section 4 Supplementary Physical Characterizations

## Section 1 A detailed survey tellurite as heteroanions in POTs chemistry

**Table S1. A detailed survey tellurite as heteroanions in POTs chemistry**

| Year | Polyanion Formula                                                                                                                                                                                                                                                                                                                                                                         | Precursors                                                                     | Characteristics                                                                                                                              | Ref. |
|------|-------------------------------------------------------------------------------------------------------------------------------------------------------------------------------------------------------------------------------------------------------------------------------------------------------------------------------------------------------------------------------------------|--------------------------------------------------------------------------------|----------------------------------------------------------------------------------------------------------------------------------------------|------|
| 1991 | $[\text{TeW}_6\text{O}_{24}]^{6-}$                                                                                                                                                                                                                                                                                                                                                        | $\text{WO}_4^{2-}$<br>$\text{TeO}_2$                                           | the first examples of the Anderson-Evans type tungstotellurate                                                                               | 1    |
| 1998 | $[(\text{Mn}^{\text{II}}(\text{H}_2\text{O})_3)_2(\text{Mn}^{\text{II}}(\text{H}_2\text{O})_2)_2(\text{TeW}_9\text{O}_{33})_2]^{8-}$                                                                                                                                                                                                                                                      | $\text{WO}_4^{2-}$<br>$\text{TeO}_2$                                           | it can be acted as homogeneous catalysts for the epoxidation of dienes                                                                       | 2    |
| 2001 | $[(\alpha\text{-TeW}_9\text{O}_{33})_2\text{Cu}_3(\text{H}_2\text{O})_3]^{10-}$                                                                                                                                                                                                                                                                                                           | $\text{WO}_4^{2-}$<br>$\text{Te}^{4+}$                                         | dimeric, sandwich-type transition-metal-substituted POTs                                                                                     | 3    |
| 2002 | $[\text{Fe}_4(\text{H}_2\text{O})_{10}(\beta\text{-Te}^{\text{IV}}\text{W}_9\text{O}_{33})_2]^{4-}$                                                                                                                                                                                                                                                                                       | $\text{WO}_4^{2-}$<br>$\text{TeO}_3^{2-}$                                      | iron(III)-substituted, dimeric POTs                                                                                                          | 4    |
| 2003 | $[(\text{Ni}(\text{H}_2\text{O})_3)_2(\text{WO}_2)(\text{Ni}(\text{H}_2\text{O})_2)(\text{TeW}_9\text{O}_{33})_2]^{8-}$<br>$[(\text{Zn}(\text{H}_2\text{O})_3)_2(\text{WO}_2)_{1.5}(\text{Zn}(\text{H}_2\text{O})_2)_{0.5}(\text{TeW}_9\text{O}_{33})_2]^{8-}$<br>$[(\text{Co}(\text{H}_2\text{O})_3)_2(\text{WO}_2)(\text{Co}(\text{H}_2\text{O})_2)(\text{TeW}_9\text{O}_{33})_2]^{8-}$ | $\text{WO}_4^{2-}$<br>$\text{TeO}_2$                                           | sandwich-type tungstotellurates                                                                                                              | 5    |
| 2003 | $[(\text{UO}_2)_2(\text{H}_2\text{O})_2(\text{TeW}_9\text{O}_{33})_2]^{12-}$                                                                                                                                                                                                                                                                                                              | $[\text{TeW}_9\text{O}_{33}]^{8-}$                                             | the structure of the complexes are of an unprecedented type having ‘open’ structures with four unsaturated oxygen atoms                      | 6    |
| 2008 | $[\text{H}_3\text{W}_{18}\text{O}_{57}(\text{Te}^{\text{IV}}\text{O}_3)]^{5-}$                                                                                                                                                                                                                                                                                                            | $[\text{H}_3\text{W}_{18}\text{O}_{56}(\text{Te}^{\text{VI}}\text{O}_6)]^{6-}$ | the pyramidal tellurite anion $\text{Te}^{\text{IV}}\text{O}_3^{2-}$ acts as a template supporting the $\{\text{W}_{18}\text{O}_{54}\}$ cage | 7    |
| 2009 | $[\text{H}_2\text{Te}_4\text{W}_{20}\text{O}_{80}]^{22-}$<br>$[\text{NaTeW}_{15}\text{O}_{54}]^{13-}$                                                                                                                                                                                                                                                                                     | $\text{WO}_4^{2-}$<br>$\text{TeO}_2$                                           | novel tungstotellurates containing two pairs of face-shared $\text{WO}_6$ octahedra                                                          | 8    |
| 2010 | $[\text{Te}_2\text{W}_{17}\text{O}_{61}]^{12-}$<br>$[\text{Te}_2\text{W}_{16}\text{O}_{58}(\text{OH})_2]^{14-}$                                                                                                                                                                                                                                                                           | $\text{WO}_4^{2-}$<br>$\text{TeO}_2$                                           | the three lacunary POMs reported herein represent                                                                                            | 9    |

|      |                                                                                                                                                                                                                                                                                                                                                            |                                           |                                                                            |           |
|------|------------------------------------------------------------------------------------------------------------------------------------------------------------------------------------------------------------------------------------------------------------------------------------------------------------------------------------------------------------|-------------------------------------------|----------------------------------------------------------------------------|-----------|
|      | $[\text{Te}_2\text{W}_{18}\text{O}_{62}(\text{OH})_2]^{10-}$                                                                                                                                                                                                                                                                                               |                                           | important new well-defined precursors for functionalised POMs.             |           |
| 2011 | $[\text{Pd}_3(\text{TeW}_9\text{O}_{33})_2]^{10-}$<br>$[(\text{WO}_2)_4(\text{Te}_2\text{W}_{15}\text{O}_{54})_4]^{32-}$<br>$[\text{Te}_3\text{W}_{21}\text{O}_{75}]^{12-}$                                                                                                                                                                                | $\text{WO}_4^{2-}$<br>$\text{TeO}_3^{2-}$ | molecular “layered” heteropolyoxometalate architectures                    | 10        |
| 2011 | $[\text{W}_{28}\text{Te}_8\text{O}_{112}]^{24-}$<br>$[\text{W}_{28}\text{Te}_9\text{O}_{115}]^{26-}$<br>$[\text{W}_{28}\text{Te}_{10}\text{O}_{118}]^{28-}$                                                                                                                                                                                                | $\text{WO}_4^{2-}$<br>$\text{TeO}_3^{2-}$ | a new class of macrocyclic tungstotellurite heteropolyacid cluster-squares | 11        |
| 2013 | $[\{(\text{TeO}_3)\text{W}_{10}\text{O}_{34}\}_8\{\text{Ce}_8(\text{H}_2\text{O})_{20}\}(\text{WO}_2)_4(\text{W}_4\text{O}_{12})]^{48-}$                                                                                                                                                                                                                   | $\text{WO}_4^{2-}$<br>$\text{TeO}_3^{2-}$ | the first lanthanide-containing POTs with tellurium heteroatom             | 12        |
| 2014 | $[\text{Pd}_6\text{Te}_{19}\text{W}_{42}\text{O}_{190}]^{40-}$                                                                                                                                                                                                                                                                                             | $\text{WO}_4^{2-}$<br>$\text{TeO}_3^{2-}$ | high-nuclearity palladium-rich POMs                                        | 13        |
| 2014 | $[\text{H}_{10}\text{Ag}_{18}\text{Cl}(\text{Te}_3\text{W}_{38}\text{O}_{134})_2]^{29-}$<br>$\{[\text{H}_{13}\text{Ag}_{18}\text{Cl}(\text{Te}_3\text{W}_{38}\text{O}_{134})_2]^{26-}\}_2$<br>$\{[\text{H}_{15}\text{Ag}_{18}\text{Cl}(\text{Te}_3\text{W}_{38}\text{O}_{134})_2]^{24-}\}_n$<br>$[\text{H}_2\text{Te}_3\text{W}_{43}\text{O}_{148}]^{24-}$ | $\text{WO}_4^{2-}$<br>$\text{TeO}_3^{2-}$ | time-resolved assembly of cluster-in-cluster POTs                          | 14        |
| 2015 | $[(\text{C}_4\text{H}_8\text{Te}^{\text{IV}})_3(\text{X}^{\text{III}}\text{W}_9\text{O}_{33})_2]^{12-}$ (X = As or Sb)                                                                                                                                                                                                                                     | $\text{C}_4\text{H}_8\text{TeI}_2$        | first organotellurium-containing POMs                                      | 15        |
| 2015 | $[\{\text{Mn}(\text{CO})_3\}(\text{Mn}(\text{H}_2\text{O})_2)(\text{Mn}(\text{H}_2\text{O})_3)(\text{TeW}_9\text{O}_{33})]_2^{6-}$                                                                                                                                                                                                                         | $[\text{TeW}_9\text{O}_{33}]^{8-}$        | novel POM-based carbonyl manganese derivative                              | 16        |
| 2015 | $[\text{Ce}_{10}\text{Te}_8\text{W}_{88}\text{O}_{298}(\text{H}_2\text{O})_{40}(\text{OH})_{12}]^{18-}$                                                                                                                                                                                                                                                    | $\text{WO}_4^{2-}$<br>$\text{TeO}_3^{2-}$ | large cerium(III)-stabilized tungstotellurites(IV) nanocluster             | this work |

## References:

- [1] E. S. Ganelina (1962). *Russ. J. Inorg. Chem.*, **7**, 812; E. S. Ganelina and N. I. Nerevyatkina (1965). *Russ. J. Inorg. Chem.*, **10**, 483; R. Ripan and N. Calu (1965). *Stud. Univ. Babes-Bolyai Chem.*, **10**, 135.
- [2] M. Bösing, A. Nöh, I. Loose and B. Krebs, *J. Am. Chem. Soc.*, 1998, **120**, 7252.
- [3] U. Kortz, N. K. Al-Kassem, M. G. Savelieff, N. A. Al Kadi and M. Sadakane, *Inorg. Chem.*, 2001, **40**, 4742.
- [4] U. Kortz, M. G. Savelieff, B. S. Bassil, B. Keita and L. Nadjjo, *Inorg. Chem.*, 2002, **41**, 783–789.
- [5] E. M. Limanski, D. Drewes, E. Droste, R. Böhner and B. Krebs, *J. Mol. Struct.*, 2003, **656**, 17–25.
- [6] A. J. Gaunt, I. May, R. Copping, A. I. Bhatt, D. Collison, O. D. Fox, K. T. Holman and M. T. Pope, *Dalton Trans.*, 2003, 3009–3014.
- [7] J. Yan, D.-L. Long, E. F. Wilson and L. Cronin, *Angew. Chem. Int. Ed.*, 2009, **48**, 4376–4380.
- [8] A. H. Ismail, N. H. Nsouli, M. H. Dickman, J. Knez and U. Kortz, *J. Cluster Sci.*, 2009, **20**, 453–465.
- [9] C. Ritchie, K. G. Alley and C. Boskovic, *Dalton Trans.*, 2010, **39**, 8872–8874.
- [10] J. Gao, J. Yan, S. Beeg, D.-L. Long and L. Cronin, *Angew. Chem. Int. Ed.*, 2012, **51**, 3373–3376.
- [11] J. Gao, J. Yan, S. G. Mitchell, H. N. Miras, A. G. Boulay, D.-L. Long, L. Cronin, *Chem. Sci.*, 2011, **2**, 1502–1508.
- [12] W.-C. Chen, H.-L. Li, X.-L. Wang, K.-Z. Shao, Z.-M. Su and E.-B. Wang, *Chem. – Eur. J.*, 2013, **19**, 11007–11015.
- [13] J. M. Cameron, J. Gao, D.-L. Long and L. Cronin, *Inorg. Chem. Front.*, 2014, **1**, 178–185.
- [14] C. Zhan, J. W. Cameron, J. Gao, J. M. Purcell, D.-L. Long and L. Cronin, *Angew. Chem. Int. Ed.*, 2014, **53**, 10362–10366.
- [15] B. Kandasamy, B. S. Bassil, A. Haider, J. Beckmann, B. H. Chen, N. Dalal and U. Kortz, *J. Organ. C.*, 2015, DOI: 10.1016/j.jorganchem.2015.03.004.
- [16] Y. B Liu, Y. H. Zhang, P. T. Ma, Y. K. Dong, J. Y. Niu and J. P. Wang, *Inorg. Chem. Commun.*, 2015, DOI: 10.1016/j.inoche.2015.03.043.

## Section 2 Synthesis, Crystal Data, and Structures of **1**

### 2.1 Synthesis Discussion

The precise control of the one-pot reaction conditions of combining  $\text{Ce}^{3+}$  groups with the  $\text{TeO}_3^{2-}$  anion templates at proper pH was employed for the assembly of **1**. Since the  $\text{TeO}_3^{2-}$  anion templates have a lone pair of electrons and only form three bonds through oxygen atoms in trigonal configurations, they effectively give rise to “open” lacunary units instead of “closed” Keggin-type clusters, owing to the inducing effect of the lone pair of electrons. Such templates can also be viewed as “inorganic ligands” as well as linkers according to previous reports. Moreover, the electrophile  $\text{Ce}^{3+}$  groups possess highly oxophilic nature, high coordination numbers and diverse coordination geometries. Therefore, a synergistic effect between  $\text{Ce}^{3+}$  groups and the anion template effect of  $\text{TeO}_3^{2-}$  may guide the construction of unprecedented lanthanide-containing tungstotellurites(IV).

The synthetic strategy employed in the present work builds on that reported previously by some of us (see *Chem. Eur. J.* 2013, **19**, 11007; *Cryst. Growth Des.* 2014, **10**, 5099; *Chem. Asian J.* 2015, DOI:10.1002/asia.201500004). First, we chose  $\text{Na}_2\text{WO}_4$  and  $\text{Na}_2\text{TeO}_3$  as the W- & Te-sources. The acidification of them (W/Te molar ratio 11:1) by acetic acid was necessary and the molar ratio also plays an important role that is in accordance with the final structure: the  $\{\text{Te}_8\text{W}_{88}\}$  cluster (W:Te molar ratio 11:1). Subsequently, the electrophile  $\text{Ce}^{3+}$  salts were introduced to the acid solution. Compared to the reported synthesis of tungstotellurite nanoclusters  $\{\text{Ce}_8\text{Te}_8\text{W}_{88}\}$ , the counteranion ( $\text{K}^+$ ) was not used for **1**: parallel experiment reveals that when KCl was used there were no crystals obtained but precipitation. Thus  $\text{Na}^+$  cation was suitable for the isolation of **1**. Finally, some efficient observations during the syntheses of **1** should be mentioned: (1) The combination of  $\text{Ce}^{3+}$  groups with  $\text{TeO}_3^{2-}$  heteroanion templates seems to be a potential strategy to build novel lanthanide-containing POTs, which may be due to the inducing effect of the lone pair of electrons in  $\text{TeO}_3^{2-}$  and the diverse coordination numbers and geometries of  $\text{Ce}^{3+}$  centers; (2) the correct choice of counteranions and the suitable molar ratio also play important roles in preparation of final architectures.

## 2.2 Crystal Data

**Table S2.** Crystal Data and Structure Refinements for **1**.

|                                          | <b>1</b>                                                                                            |
|------------------------------------------|-----------------------------------------------------------------------------------------------------|
| Empirical formula                        | H <sub>200</sub> Ce <sub>10</sub> Na <sub>18</sub> O <sub>404</sub> Te <sub>8</sub> W <sub>88</sub> |
| <i>M</i>                                 | 25680.22                                                                                            |
| $\lambda/\text{\AA}$                     | 0.71073                                                                                             |
| <i>T</i> /K                              | 296(2)                                                                                              |
| Crystal system                           | Triclinic                                                                                           |
| Space group                              | <i>P</i> $\bar{1}$                                                                                  |
| <i>a</i> /\AA                            | 20.6145(12)                                                                                         |
| <i>b</i> /\AA                            | 25.4599(15)                                                                                         |
| <i>c</i> /\AA                            | 30.7077(18)                                                                                         |
| $\alpha/^\circ$                          | 84.6720(10)                                                                                         |
| $\beta/^\circ$                           | 77.4110(10)                                                                                         |
| $\gamma/^\circ$                          | 81.8700(10)                                                                                         |
| <i>V</i> /\AA <sup>3</sup>               | 15539.0(16)                                                                                         |
| <i>Z</i>                                 | 1                                                                                                   |
| <i>D<sub>c</sub></i> /Mg m <sup>-3</sup> | 2.744                                                                                               |
| $\mu/\text{mm}^{-1}$                     | 17.378                                                                                              |
| <i>F</i> (000)                           | 11138                                                                                               |
| $\theta$ Range/ $^\circ$                 | 0.68–25.00                                                                                          |
| Measured reflections                     | 90756                                                                                               |
| Independent reflections                  | 54747                                                                                               |
| $R_{int}$<br>after SQUEEZE               | 0.0898                                                                                              |
| obsd ( <i>I</i> > 2σ( <i>I</i> ))        | 20284                                                                                               |
| Goodness-of-fit on <i>F</i> <sup>2</sup> | 0.963                                                                                               |
| $R_1(I > 2\sigma(I))^a$                  | 0.0605                                                                                              |
| $wR_2$ (all data) <sup>b</sup>           | 0.1525                                                                                              |

$$^a R_1 = \sum ||F_o| - |F_c|| / \sum |F_o|. \quad ^b wR_2 = \{ \sum [w(F_o^2 - F_c^2)^2] / \sum [w(F_o^2)^2] \}^{1/2}.$$

**Single-crystal X-ray diffraction:** Single-crystal X-ray diffraction data for **1** was recorded on a Bruker Apex CCD II area-detector diffractometer with graphite-monochromated Mo $K\alpha$  radiation ( $\lambda = 0.71073$  Å) at 296(2) K. Absorption corrections were applied using multiscan technique and performed by using the SADABS program<sup>1</sup>. The structures of **1** was solved by direct methods and refined on  $F^2$  by full-matrix leastsquares methods by using the SHELXTL package<sup>2</sup>. The numbers of lattice water molecules and counter cations for **1** was estimated by the results of elemental analyses, TG curves, and calculations of electron count in the voids with SQUEEZE<sup>3</sup>.

During the refinement, all the Ce, W and Te atoms were refined anisotropically, while the rest of the cations and all of the solvent water molecules were just refined isotropically because of their unusual anisotropic thermal parameters and obvious disorder problems. H atoms on lattice water molecules cannot be found from the residual peaks and were directly included in the final molecular formula. The 'omit -3 50' command was used to omit the weak reflections above 50 degree. The highest residual peak is 3.845 eÅ<sup>-3</sup> and the deepest hole is -2.613 eÅ<sup>-3</sup>. About 4 solvent water molecules and 2 Na<sup>+</sup> cations were found crystallographically; based on the TGA curve, BVS calculations and elemental analyses, another 50 water molecules, 16 Na<sup>+</sup> cations and 20 H<sup>+</sup> were included into the molecular formula directly. The void is large enough and contains enough electronic density to accommodate all Na<sup>+</sup>/H<sub>2</sub>O that cannot be determined crystallographically.

#### References:

- [1] Sheldrick, G. *SADABS*; ver. 2.10; University of Gottingen: Göttingen, Germany, **2003**.
- [2] Sheldrick, G. M. *SHELXL-97, Program for the Refinement of Crystal Structure*; University of Gottingen: Göttingen, Germany, **1993**.
- [3] Spek, A. L. *PLATON, A Multipurpose Crystallographic Tool*; Utrecht University, Utrecht, The Netherlands, **2003**.

### 2.3 Structures of 1

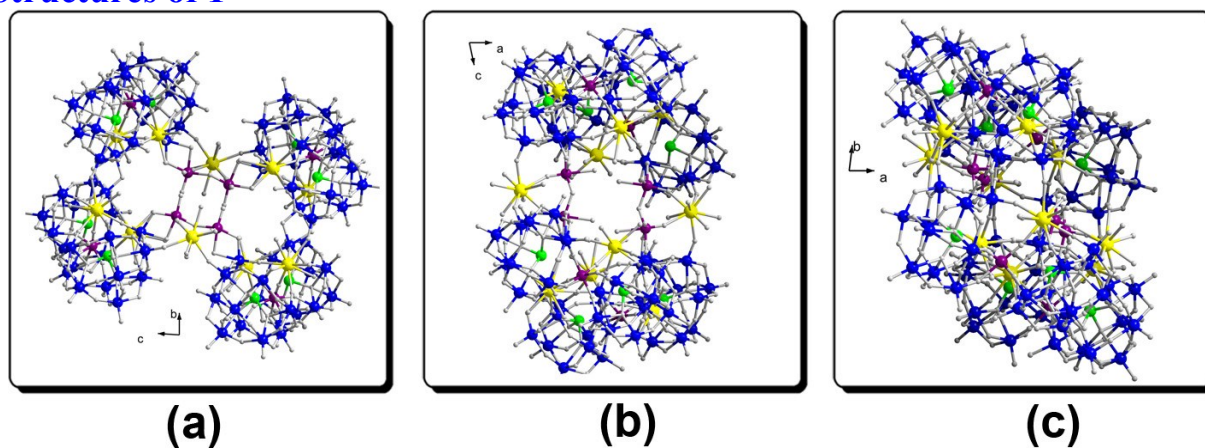

Fig. S1. Structure of anionic cluster (1a) in different orientations: (a) bc-view, (b) ac-view, (c) ab-view.

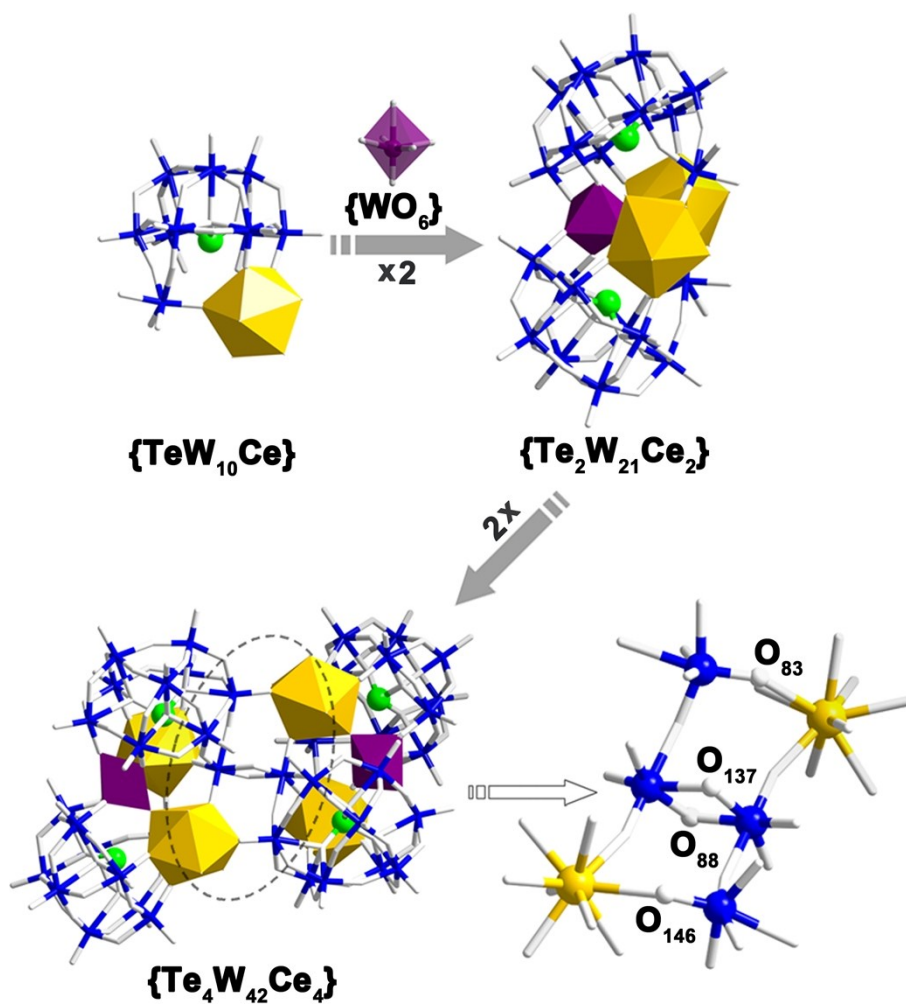

Fig. S2. The formation structure of the  $\{Ce_4Te_4W_{42}\}$  subunits.

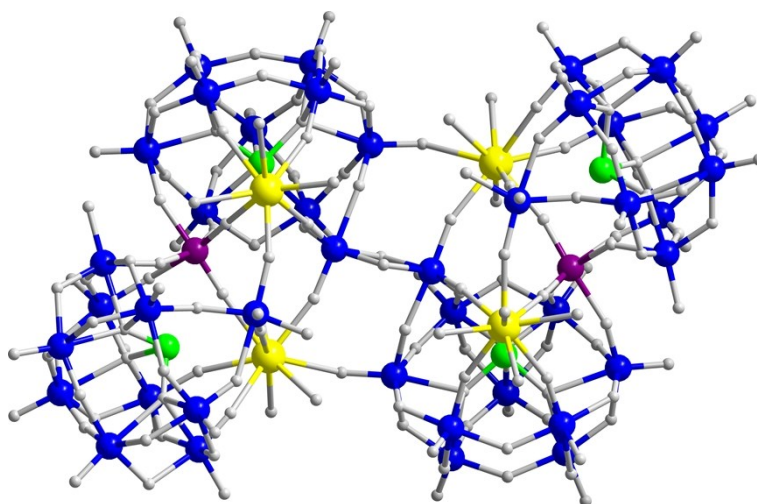

**Fig. S3.** The structure of the  $\{\text{Ce}_4\text{Te}_4\text{W}_{42}\}$  subunits.

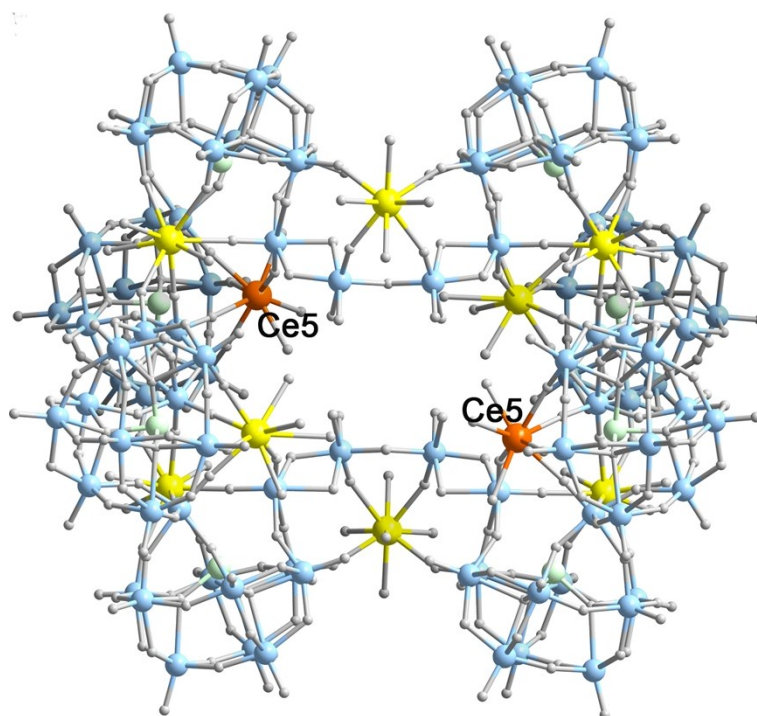

**Fig. S4.** The eight-coordinate Ce5 in the  $\{\text{Ce}_4\text{Te}_4\text{W}_{42}\}$  subunit.

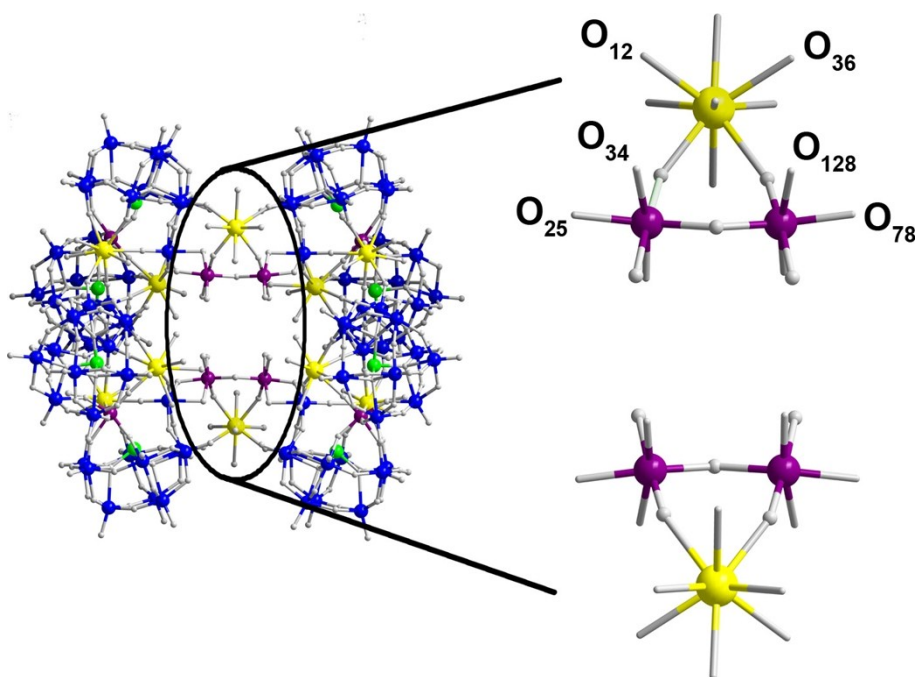

**Fig. S5.** Ball-and-stick representation of the two triangle-shaped  $\{\text{CeW}_2\text{O}_5(\text{H}_2\text{O})_7\}$  linkers (right) in the center of **1a** (left).

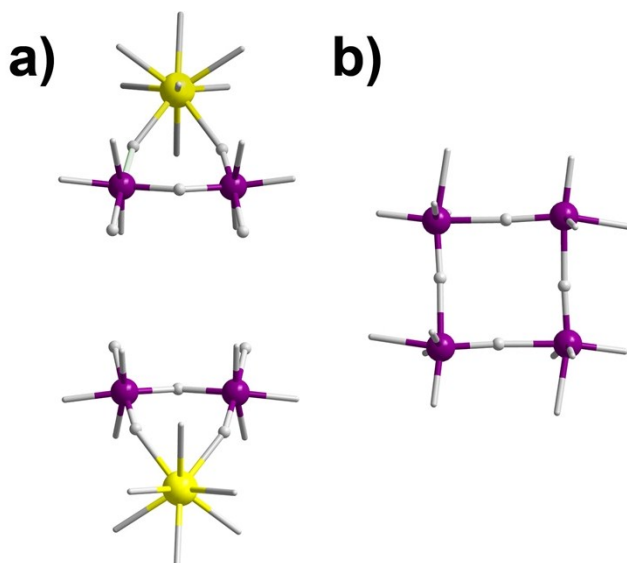

**Fig. S6.** A comparative of the different linkers in Ce-containing tungstotellurites nanocluster.

## 2.4 The BVS Calculation Result of the Oxygen Atoms

**Table S3.** The BVS calculation results of the oxygen atoms in **1**.

| Oxygen Code                  | Bond Valence | Protonation Degree | Oxygen Code | Bond Valence | Protonation Degree |
|------------------------------|--------------|--------------------|-------------|--------------|--------------------|
| O34                          | 0.979        | 1                  | O95         | 1.199        | 1                  |
| O68                          | 0.319        | 2                  | O128        | 0.980        | 1                  |
| O90                          | 1.093        | 1                  | O133        | 0.300        | 2                  |
| O92                          | 1.105        | 1                  | O137        | 1.037        | 1                  |
| Total 20 protons per cluster |              |                    |             |              |                    |

## Section 3 Experimental Section

### 3.1 Materials and Physical Measurements

**Characterization:** Elemental analysis of Na, Te, W, and Ce were performed with a Leaman inductively coupled plasma (ICP) spectrometer. IR spectra were recorded on an Alpha Centauri FTIR spectrophotometer on pressed KBr pellets in the range 400~4000  $\text{cm}^{-1}$ . Water contents were determined by TG analyses on a PerkinElmer TGA7 instrument in flowing  $\text{N}_2$  with a heating rate of 10  $^{\circ}\text{C min}^{-1}$ . X-ray photoelectron spectroscopy was performed on a VG ESCALABMKII spectrometer with an  $\text{Mg}_{\text{K}\alpha}$  (1253.6 eV) achromatic X-ray source. The vacuum inside the analysis chamber was maintained at  $6.2 \times 10^{-6}$  Pa during the analysis.

**Magnetic measurements:** Magnetic susceptibility measurements on **1** was performed with a Quantum Design SQUID magnetometer (MPMS-XL). The dc measurements were conducted from 2.0 to 300 K at 0.1 T on polycrystalline samples. Experimental data were corrected for the sample holder and for the diamagnetic contribution of the sample, calculated from Pascal constants.

## Section 4 Supplementary Physical Characterizations

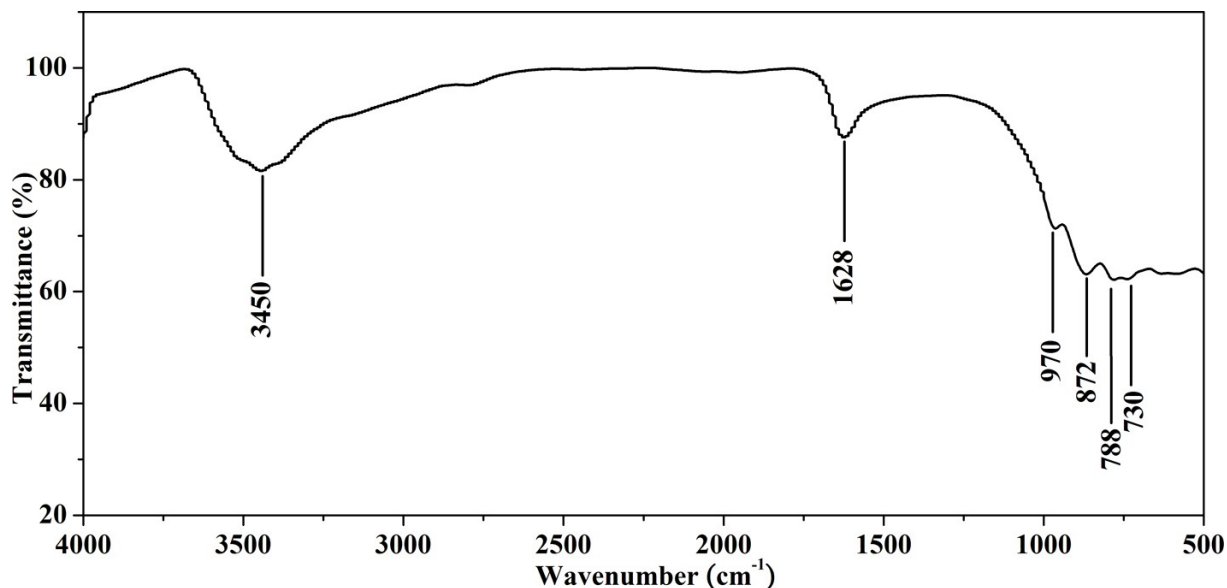

**Fig. S7.** IR spectrum of **1**: The characteristic peaks at 970, 872, 788, and 730  $\text{cm}^{-1}$  are ascribed to vibrations of  $\nu(\text{Te}-\text{O})$ ,  $\nu(\text{W}=\text{Od})$ ,  $\nu(\text{W}-\text{Ob})$ , and  $\nu(\text{W}-\text{Oc})$ , respectively. The broad peak at 3450  $\text{cm}^{-1}$  and the strong peak at 1628  $\text{cm}^{-1}$  are attributed to the lattice water molecules and aqua ligands.

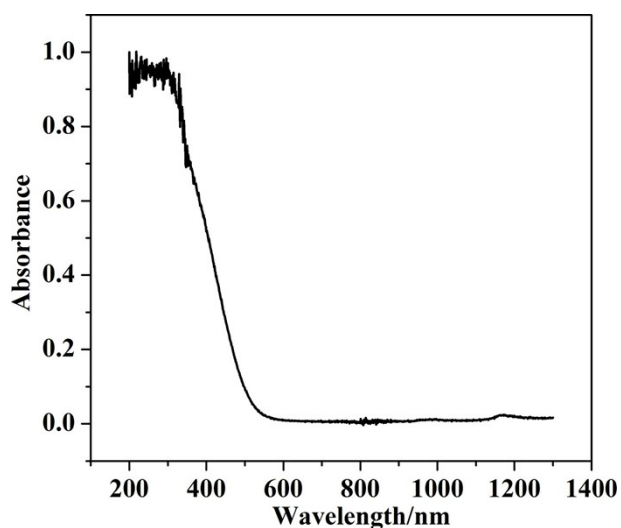

**Fig. S8.** UV-vis-NIR diffuse spectra of **1**. In the UV region (200 nm – 400 nm), we can find one broad peak around 300 nm, which are associated with the charge-transfer bands corresponding to  $\text{O}_t \rightarrow \text{W}$  and  $\text{O}_{b,c} \rightarrow \text{W}$  (*CrystEngComm*, 2014, **16**, 10746) in the polyoxoanions of **1**. In the vis (400 nm – 760 nm) and NIR (760 nm – 1100 nm) region, there was no absorption.

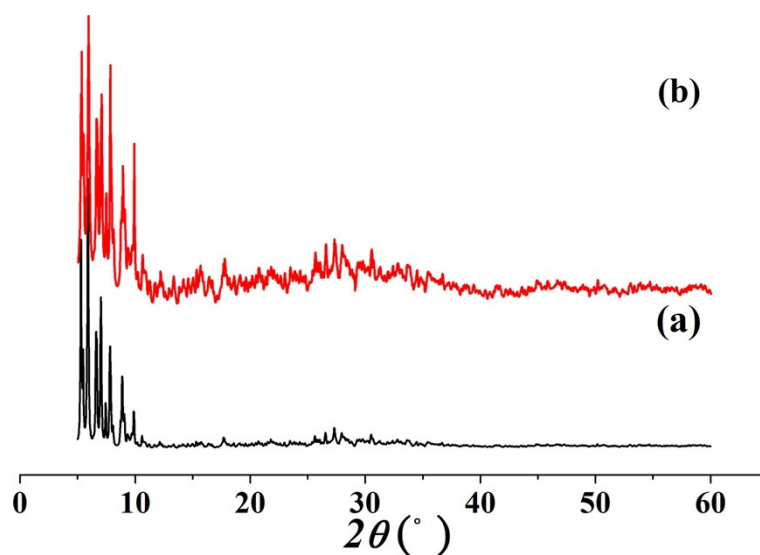

**Fig. S9.** The XRPD patterns for simulated (a) and as-synthesized (b) of **1**.

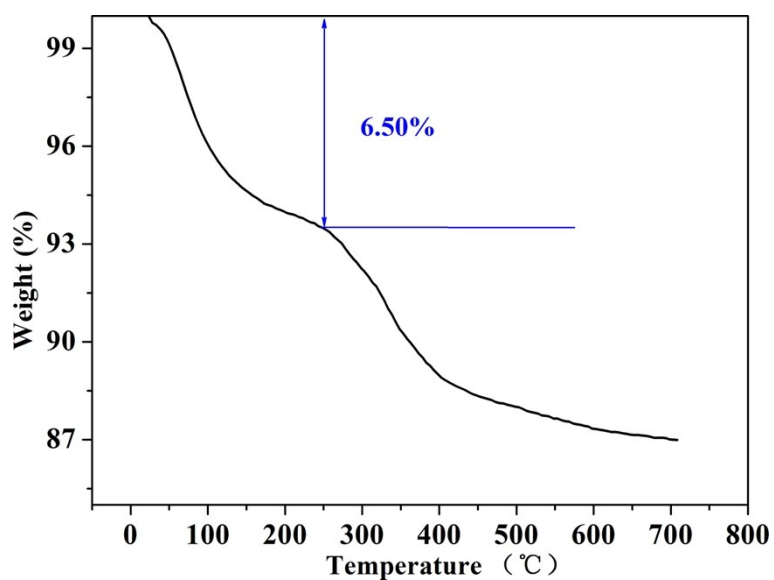

**Fig. S10.** TG curve of **1**. The first weight loss is in the temperature range of 50 ~ 250 °C. The value of ca. 6.50% is in accordance with the calculated value of 6.45 % (~94H<sub>2</sub>O including 40 aqua ligands and 54 lattice water molecules). Then the structure begins to decompose.
